# Supplementary material for: Nitrogen Fixation in Arctic Coastal Waters (Qeqertarsuaq, West Greenland): Influence of Glacial Melt on Diazotrophs, Nutrient Availability, and Seasonal Blooms
Source: Copernicus journal article supplement (doi:10.5194/egusphere-2024-3680), 2024-12-13
Supplement: Supplementary file 1 [file supplementary Tables[1].xlsx]

## Sheet: Table S1
Tble S1. Compilation of nif sequences as well as homologous from NCBI top hit. The protein sequences from this study were recruited in the translated non-redudunt gene catalog after running CDHIT-EST with 95% identity cutoff.
ID	Database	KEGG_entry	KEGG_definition	Sequence_description	Percent identity to the top hit	Translated sequence
k141_583522_1_4	This study	K02588	nifH; nitrogenase iron protein NifH		0.9921	MRQIAFYGKGGIGKSTTSQNTIAALSENNRIMIVGCDPKADSTRLMLHCKAQTTVLHLAA ERGTVEDIELDEVVIPGYNNVLCVESGGPEPGVGCAGRGIITAINFLEEEGAYENLDFVS YDVLGDVVCGGFAMPIREGKAQEIYIVTSGEMMAMYAANNIARGILKYAHTGGVRLGGLI CNSRNVNCESELITELASRLGTQMIHFVPRSKQVQEAELRRMTVIEYTPNHPQADEYRTL ASKIQNNEMFIV
k141_352983_1_4	This study	K02588	nifH; nitrogenase iron protein NifH		0.9918	LHCKAQTTVLHLAAERGTVEDIELDEVVIPGYNNVLCVESGGPEPGVGCAGRGIITAINF LEEEGAYENLDFVSYDVLGDVVCGGFAMPIREGKAQEIYIVTSGEMMAMYAANNIARGIL KYAHTGGVRLGGLICNSRNVNCESELITELASRLGTQMIHFVPRSKQVQEAELRRMTVIE YTPNHPQADEYRTLASKIQNNEMFIVPTPISMEELEELLVDFGILGGEDEYEKALEADKA SGK
k141_99201_1_4	This study	K02586	nifD; nitrogenase molybdenum-iron protein alpha chain		0.9951	IKDMIHISHGPVGCGYYSWSGRRNYYIGVTGVDSFGTMNFTSDFQERDVVFGGDTKLSQL IDEVEILFPLNGGISVQSECPIGLIGDDIEAVSRTKTKEIGKQVIPVRCEGFRGVSQSLG HHIANDVIRDWVFPVADKEIAEKGHEGTPYDVAIIGDYNIGGDAWSSRILLEEMGLRVIA QWSGDGTFTEMKATPSVKLNLVHCYRSMNYISRHMEEKYGIPWLEYNFFGPSKIIESLRA IAERFDDTIQQKAEAVIAKYKEQADGIIAKYRPRLEGKTVMMMVGGLRPRHVVPAFKDLG MEIIGTGYEFAHGDDYKRTTHYVKDATLIYDDVTGYEFEEFVKELKPDLVAAGIKEKYVF QKMALPFRQMHSWDYSGPYHGYDGFAIFARDMD…
k141_505759_2	This study	K02586	nifD; nitrogenase molybdenum-iron protein alpha chain		0.9948	MATVEENKKLIADVLATYPAKAAKKRNKHLGVYEEGADDCGVKSNKVSLPGVMTARGCAY AGSKGVVWGPIKDMIHISHGPVGCGYYSWSGRRNYYIGVTGVDSFGTMNFTSDFQERDVV FGGDTKLSQLIDEVEILFPLNGGISVQSECPIGLIGDDIEAVSRTKTKEIGKQVIPVRCE GFRGVSQSLGHH
k141_762918_2	This study	K02591	nifK; nitrogenase molybdenum-iron protein beta chain		0.9948	MVDGLQNAYALYKPKMIAVCTTCMAEVIGDDLGSFIGNARVDGVIPAELPIPFAHTPSFV GSHVNGYDHMMKSILTTLGEGKKGDKNGKINFMPGFETYMGNLRELKKLIAALGVNGTIL SDTEMYLDSPNLGEFSMYHEGTSLEDAADACNAEATISLQAYTTPKTLAYMAKKWGQKTC VHRPWGIKATDEFLMTLSQLTGNPIPKELEIERGRAVDAMTDTQAWLHGKTAAVFGDPDT VMGLLQFMLEMGIEPVHILVHNSNDKFETEARDLLASSPYGQQATVWGYKDLWHLRSLLF TEPVDFMIGNSYGKYLERDTEIPLIRIGYPIFDRHHLHRYSTIGYGGAINLLNWIANGVL DALDRRTDIAGETDISFDLVR
k141_249360_1	This study	K02591	nifK; nitrogenase molybdenum-iron protein beta chain		0.9946	MAQNVNKIKDHVELFHQPEYKELFANKKQFEGMPTAEKVKEVAEWTKSWEYREKNFAREA LTVNPAKACQPLGALLAAVGFEGTLPFVHGSQGCVSYFRTHLTRHFKEPVSAVSSSMTEN AAVFGGLSNMVDGLQNAYALYKPKMIAVCTTCMAEVIGDDLGSFIGNARVDGVIPAELPI PFAHTPSFVGSHVNGYDHMMKSILTTLGEGKKGDKNGKINFMPGFETYMGNLRELKKLIA ALGVNGTILSDTEMYLDSPNLGEFSMYHEGTSLEDAADACNAEATISLQAYTTPKTLAYM AKKWGQKTCVHRPWGIKATDEFLMTLSQLTGNPIPKELEIERGRAVDAMTDTQAWLHGKT AAVFGDPD
k141_372767_2_3	This study	K02591	nifK; nitrogenase molybdenum-iron protein beta chain		0.8197	VHNSNDKFETEARDLLASSPYGQQATLLGYKHLWHLRSLLFTEPVDFMIGNSSVRWRDRL TFSREPSTRLPASKTWCARWRTTPHSPKITCASAFRNLPPCITIRRTLGGPTPPSRWAIG SWSMLGTYYYPPTSTDPQLSS
Identifier for top hit
WP_040054948.1	NCBI	K02588	nifH; nitrogenase iron protein NifH	Candidatus Atelocyanobacterium thalassa		MRQIAFYGKGGIGKSTTSQNTIAALSENNRIMIVGCDPKADSTRLMLHCKAQTTVLHLAAERGTVEDIELDEVVIPGYNN VLCVESGGPEPGVGCAGRGIITAINFLEEEGAYENLDFVSYDVLGDVVCGGFAMPIREGKAQEIYIVTSGEMMAMYAANN IARGILKYAHTGGVRLGGLICNSRNVNCEAELITELASRLGTQMIHFVPRSKQVQEAELRRMTVIEYTPNHPQADEYRTL ANKIQNNEMFIV
WP_229636966.1	NCBI	K02586	nifD; nitrogenase molybdenum-iron protein alpha chain	Candidatus Atelocyanobacterium thalassa		IKDMIHISHGPVGCGYYSWSGRRNYYIGVTGVDSFGTMNFTSDFQERDVVFGGDTKLSQLIDEVEILFPLNGGISVQSEC PIGLIGDDIEAVSRAKTKEIGKQVIPVRCEGFRGVSQSLGHHIANDVIRDWVFPVADKEIAEKGNEGTPYDVAIIGDYNI GGDAWSSRILLEEMGLRVIAQWSGDGTFTEMKATPSVKLNLVHCYRSMNYISRHMEEKYGIPWLEYNFFGPSKIIESLRA IAERFDDTIQQKAEAVIAKYKEQADGIIAKYRPRLEGKTVMMMVGGLRPRHVVPAFKDLGMEIIGTGYEFAHGDDYKRTT HYVKDATLIYDDVTGYEFEEFVKELKPDLVAAGIKEKYVFQKMALPFRQMHSWDYSGPYHGYDGFAIFARDMDLA…
WP_229636967.1	NCBI	K02591	nifK; nitrogenase molybdenum-iron protein beta chain	Candidatus Atelocyanobacterium thalassa		MAQNVNKIKDHVELFHQPEYKELFANKKQFEGMPTAEKVKEVAEWTKSWEYREKNFAREALTVNPAKGCQPLGALLAAVG FEGTLPFVHGSQGCVSYFRTHLTRHFKEPVSAVSSSMTENAAVFGGLSNMVDGLQNAYALYKPKMIAVCTTCMAEVIGDD LGSFIGNARVDGVIPAELPIPFAHTPSFVGSHVNGYDHMMKSILTTLGEGKKGDKNGKINFMPGFETYMGNLRELKKLIA ALGVNGTILSDTEMYLDSPNLGEFSMYHEGTSLEDAADACNAEATISLQAYTTPKTLAYMGKKWGQKTCVHRPWGIKATD EFLMTLSQLTGNPIPKELEIERGRAVDAMTDTQAWLHGKTAAVFGDPD

## Sheet: Table S2
Table S2. Relative abundance (%) of assigned taxonomy of diverse diatoms across the stations S3, S7 and S10. The abundant groups were selected based on the sample of S7_25m as this sample was with the highest abundance of diatoms.
									Relative abundance (%) within Bacillariophyta (top relative abundance of gene sequences were seleted based on the sample of S7_25m)
Sequence ID in non-redundant gene catolog	evalue	eggNOG_OGs	Top hit in NCBI	Genus in NCBI	Class in NCBI	KEGG number	Description	Gene	S3_0m	S3_5m	S3_25m	S3_50m	S3_100m	S7_0m	S7_5m	S7_25m	S7_50m	S7_100m	S10_0m	S10_5m	S10_25m	S10_50m	S10_100m
k141_10525_2_3	3.75e-17	COG1850@1|root,2QTI9@2759|Eukaryota,2XE5R@2836|Bacillariophyta	QCO91642.1: ribulose-1,5-bisphosphate carboxylase/oxygenase large subunit [Eunotia sp.]	unclassified Eunotia	Bacillariophyceae	K01601	Ribulose-1,5-bisphosphate carboxylase/oxygenase large subunit	rbcL	0	0	0	18.3214	0	30.825	40.0707	61.0504	37.2207	0	11.0855	0	10.9359	14.9281	47.0083
k141_5068_2_2	0	COG1850@1|root,2QTI9@2759|Eukaryota,2XE5R@2836|Bacillariophyta	WEA82722.1: ribulose-1,5-bisphosphate carboxylase/oxygenase large subunit	Thalassiosira	Coscinodiscophyceae	K01601	Ribulose-1,5-bisphosphate carboxylase/oxygenase large subunit	rbcL	0.369241	0	0.198727	0	0	12.9027	12.7316	17.3519	5.28526	5.94124	0.330594	0.275132	0.327402	0.101857	1.19885
k141_139323_2_2	5.48e-252	COG1850@1|root,2QTI9@2759|Eukaryota,2XE5R@2836|Bacillariophyta	WEA82722.1: ribulose-1,5-bisphosphate carboxylase/oxygenase large subunit	Thalassiosira	Coscinodiscophyceae	K01601	Ribulose-1,5-bisphosphate carboxylase/oxygenase large subunit	rbcL	0	0.405398	0	0	0.9342	10.0894	9.23282	13.6399	7.42471	3.62428	0	0.207195	0.75786	0.346817	0
k141_209272_5	0	COG1850@1|root,2QTI9@2759|Eukaryota,2XE5R@2836|Bacillariophyta	QXM17313.1:ribulose-1,5-bisphosphate carboxylase/oxygenase large subunit [Chaetoceros costatus]	Chaetoceros	Coscinodiscophyceae	K01601	Ribulose-1,5-bisphosphate carboxylase/oxygenase large subunit	rbcL	0	0	0	0.282359	0	5.51907	7.89403	2.4791	1.20215	0	0.16446	0.156456	0	0.22071	0
k141_878976_1_3	0	COG1850@1|root,2QTI9@2759|Eukaryota,2XE5R@2836|Bacillariophyta	YP_010385959.1: ribulose-1,5-bisphosphate carboxylase/oxygenase large subunit [Chaetoceros gelidus]	Chaetoceros	Coscinodiscophyceae	K01601	Ribulose-1,5-bisphosphate carboxylase/oxygenase large subunit	rbcL	0.245163	0	0.843094	3.86837	4.07874	1.17095	1.20805	0.716671	0.854263	3.70572	0.175172	0.581168	0.336971	2.82119	6.61188
k141_67450_26	0	COG1850@1|root,2QTI9@2759|Eukaryota,2XE5R@2836|Bacillariophyta	QXM17572.1:ribulose-1,5-bisphosphate carboxylase/oxygenase large subunit [Chaetoceros pseudocurvisetus]	Chaetoceros	Coscinodiscophyceae	K01601	Ribulose-1,5-bisphosphate carboxylase/oxygenase large subunit	rbcL	0	0	0	0.557992	0	7.49798	3.85156	0.708476	0.20035	0	0.328919	0	0	0	0
k141_129886_4	3.95e-15	28IP8@1|root,2QR09@2759|Eukaryota,2XF0J@2836|Bacillariophyta	XAO39036.1:photosystem II protein D1 [Lindavia radiosa]	Lindavia	Coscinodiscophyceae	K02703	photosystem II P680 reaction center D1 protein	psbA	45.0497	0	47.2472	51.9361	0	53.6791	16.7312	23.7705	72.8415	0	0	39.0275	63.4259	35.8888	0
k141_86385_1_6	5.16e-145	28IP8@1|root,2QR09@2759|Eukaryota,2XF0J@2836|Bacillariophyta	YP_010537639.1: photosystem II reaction center protein D1 [Tenuicylindrus belgicus]	Tenuicylindrus	Coscinodiscophyceae	K02703	photosystem II P680 reaction center D1 protein	psbA	3.51282	2.9285	1.54701	0.806179	5.32329	11.7621	20.7734	23.2094	5.62726	29.4011	6.23523	4.7368	1.89542	7.49645	10.5598
k141_653617_4	1.23e-266	28IP8@1|root,2QR09@2759|Eukaryota,2XF0J@2836|Bacillariophyta	XAO39036.1:photosystem II protein D1 [Lindavia radiosa]	Lindavia	Coscinodiscophyceae	K02703	photosystem II P680 reaction center D1 protein	psbA	4.85019	11.0958	3.56827	2.86886	7.88522	9.05762	15.7305	15.4595	4.4685	10.1002	11.4525	3.01406	2.38742	6.0736	2.78098
k141_187766_1_4	3.59e-128	28IP8@1|root,2QR09@2759|Eukaryota,2XF0J@2836|Bacillariophyta	CAA10627.1:PSII D1 reaction-centre protein, partial [Skeletonema costatum]	Skeletonema	Coscinodiscophyceae	K02703	photosystem II P680 reaction center D1 protein	psbA	5.75541	5.30327	0.52183	3.10975	5.09216	6.09232	9.15974	13.4341	3.25217	0	10.0734	4.04538	5.54744	7.74847	1.98627
k141_441288_1_3	1.31e-165	28IP8@1|root,2QR09@2759|Eukaryota,2XF0J@2836|Bacillariophyta	QXV92907.1:D1 reaction center protein of photosystem II [Nitzschia anatoliensis]	Nitzschia	Bacillariophyceae	K02703	photosystem II P680 reaction center D1 protein	psbA	4.16548	4.32954	1.5428	2.83535	0	5.75217	11.6968	10.5631	2.74478	13.1426	0	1.56764	0.200248	1.83274	0
k141_371299_1_6	1.74e-51	28IP8@1|root,2QR09@2759|Eukaryota,2XF0J@2836|Bacillariophyta	CAA10627.1:PSII D1 reaction-centre protein, partial [Skeletonema costatum]	Skeletonema	Coscinodiscophyceae	K02703	photosystem II P680 reaction center D1 protein	psbA	1.41928	0	0.358912	0	9.93643	2.36894	3.08546	4.37662	0.332078	3.10901	4.92336	2.97187	0.835449	1.32036	4.69448
k141_277065_1_2	6.2e-125	28IP8@1|root,2QR09@2759|Eukaryota,2XF0J@2836|Bacillariophyta	AWT38994.1:photosystem II protein D1 [Eunotogramma sp.]	unclassified Eunotogramma	Mediophyceae	K02703	photosystem II P680 reaction center D1 protein	psbA	4.02482	0	5.8634	3.01979	6.68971	1.51235	3.66812	3.361	2.28424	3.18693	0	3.23978	0.821354	1.70926	0
k141_198880_1_10	1.77e-157	28IP8@1|root,2QR09@2759|Eukaryota,2XF0J@2836|Bacillariophyta	YP_010133695.1:D1 reaction center protein of photosystem II [Nitzschia supralitorea]	Nitzschia	Bacillariophyceae	K02703	photosystem II P680 reaction center D1 protein	psbA	1.28378	1.1255	2.37059	3.28311	5.15192	2.4624	4.50434	1.78172	0.600918	3.74875	4.64405	0.451479	1.67487	1.59258	4.48188
k141_767463_1_3	1.71e-263	28IP8@1|root,2QR09@2759|Eukaryota,2XF0J@2836|Bacillariophyta	YP_009093073.1: photosystem II protein D1 [Rhizosolenia imbricata]	Rhizosolenia	Coscinodiscophyceae	K02703	photosystem II P680 reaction center D1 protein	psbA	1.04191	0	0.858212	4.17209	9.33721	1.19327	2.59195	1.62097	0.739469	2.76613	0.360544	0.505217	0.996254	1.3523	3.56404
k141_199203_1_9	5.52e-128	28IP8@1|root,2QR09@2759|Eukaryota,2XF0J@2836|Bacillariophyta	YP_009092988.1: photosystem II protein D1 [Chaetoceros simplex]	Chaetoceros	Coscinodiscophyceae	K02703	photosystem II P680 reaction center D1 protein	psbA	1.28963	2.41992	3.98225	6.60206	0	0.844137	1.43099	0.724794	2.77602	3.60628	6.01615	2.5691	2.17168	5.33635	10.6461
